# Supplementary material for: Energy Hybridization with Combined Heat and Power Technologies in Supercritical Water Gasification Processes
Source: MDPI journal article supplement (doi:10.3390/app12115497), 2022-05-28
Supplement: s1 [file s1]

# Supplementary material

## MASS AND ENERGY BALANCES FOR CASE STUDIES

### 1. Base scenario

| FEED       |        |            |              |               | STREAM FROM REACTOR |        |       |      |        |       |        | LIQUID STREAM |        |        |        |       |       |        |        | GAS STREAM |       |      |        |       |       |        |        | PREHEATER |        |       | HEATER | COOLER |      |            |           |      |      |
|------------|--------|------------|--------------|---------------|---------------------|--------|-------|------|--------|-------|--------|---------------|--------|--------|--------|-------|-------|--------|--------|------------|-------|------|--------|-------|-------|--------|--------|-----------|--------|-------|--------|--------|------|------------|-----------|------|------|
| %          | kg/h   | kg/h       | °C           | °C            | kg/h                | kg/h   | kg/h  | kg/h | kg/h   | kg/h  | kg/h   | kg/h          | kg/h   | kg/h   | kg/h   | kg/h  | kg/h  | kg/h   | kg/h   | kg/h       | kg/h  | kg/h | kg/h   | kg/h  | kg/h  | kg/h   | kg/h   | kg/h      | kW     | °C    | °C     | kW     | kW   |            |           |      |      |
| X glycerol | F feed | F glycerol | T reac inlet | T reac outlet | F STREAM            | F H2   | F CH4 | FCO  | F CO2  | F GLY | F H2O  | F GAS         | F H2   | F CH4  | FCO    | F CO2 | F GLY | F H2O  | F GAS  | F H2       | F CH4 | FCO  | F CO2  | F GLY | F H2O | F GAS  | F H2   | F CH4     | FCO    | F CO2 | F GLY  | F H2O  | Duty | T cold out | T hot out | Duty | Duty |
| 10         | 1000   | 100        | 450          | 465,30        | 1000                | 1,51   | 27,44 | 0,22 | 67,74  | 0,00  | 903,09 | 902,28        | 0,0005 | 0,0146 | 0,0001 | 0,78  | 0,00  | 901,48 | 97,72  | 1,51       | 27,43 | 0,22 | 66,96  | 0,00  | 1,60  | 540,94 | 385,23 | 215,16    | 198,94 |       |        |        |      | -192,29    |           |      |      |
| 10         | 1000   | 100        | 460          | 476,41        | 1000                | 1,72   | 27,03 | 0,31 | 68,74  | 0,00  | 902,21 | 901,36        | 0,0005 | 0,0140 | 0,0001 | 0,77  | 0,00  | 900,57 | 98,64  | 1,72       | 27,01 | 0,30 | 67,96  | 0,00  | 1,64  | 550,77 | 386,68 | 215,70    | 201,55 |       |        |        |      | -192,98    |           |      |      |
| 10         | 1000   | 100        | 470          | 486,93        | 1000                | 1,92   | 26,60 | 0,42 | 69,72  | 0,00  | 901,34 | 900,43        | 0,0006 | 0,0135 | 0,0001 | 0,77  | 0,00  | 899,65 | 99,57  | 1,92       | 26,59 | 0,42 | 68,95  | 0,00  | 1,68  | 559,90 | 387,91 | 216,11    | 204,06 |       |        |        |      | -193,52    |           |      |      |
| 10         | 1000   | 100        | 480          | 496,89        | 1000                | 2,13   | 26,17 | 0,59 | 70,65  | 0,00  | 900,46 | 899,51        | 0,0006 | 0,0129 | 0,0002 | 0,76  | 0,00  | 898,74 | 100,49 | 2,13       | 26,16 | 0,59 | 69,90  | 0,00  | 1,72  | 568,36 | 388,98 | 216,52    | 206,62 |       |        |        |      | -194,08    |           |      |      |
| 10         | 1000   | 100        | 490          | 506,28        | 1000                | 2,33   | 25,72 | 0,82 | 71,50  | 0,00  | 899,62 | 898,61        | 0,0007 | 0,0124 | 0,0002 | 0,75  | 0,00  | 897,85 | 101,39 | 2,33       | 25,71 | 0,82 | 70,75  | 0,00  | 1,76  | 576,26 | 389,94 | 216,95    | 209,27 |       |        |        |      | -194,67    |           |      |      |
| 10         | 1000   | 100        | 500          | 515,01        | 1000                | 2,54   | 25,27 | 1,17 | 72,20  | 0,00  | 898,82 | 897,77        | 0,0007 | 0,0119 | 0,0003 | 0,74  | 0,00  | 897,02 | 102,23 | 2,54       | 25,26 | 1,17 | 71,46  | 0,00  | 1,80  | 583,67 | 390,83 | 217,42    | 212,01 |       |        |        |      | -195,33    |           |      |      |
| 10         | 1000   | 100        | 510          | 522,92        | 1000                | 2,73   | 24,82 | 1,66 | 72,67  | 0,00  | 898,12 | 897,02        | 0,0007 | 0,0114 | 0,0005 | 0,73  | 0,00  | 896,28 | 102,98 | 2,73       | 24,81 | 1,66 | 71,94  | 0,00  | 1,84  | 591,20 | 391,75 | 217,57    | 214,31 |       |        |        |      | -195,57    |           |      |      |
| 10         | 1000   | 100        | 520          | 529,85        | 1000                | 2,90   | 24,38 | 2,31 | 72,85  | 0,00  | 897,56 | 896,41        | 0,0008 | 0,0110 | 0,0007 | 0,71  | 0,00  | 895,68 | 103,59 | 2,90       | 24,37 | 2,31 | 72,14  | 0,00  | 1,88  | 597,30 | 392,52 | 218,60    | 217,75 |       |        |        |      | -197,00    |           |      |      |
| 10         | 1000   | 100        | 530          | 535,73        | 1000                | 3,05   | 23,96 | 3,13 | 72,72  | 0,00  | 897,14 | 895,95        | 0,0008 | 0,0106 | 0,0009 | 0,70  | 0,00  | 895,23 | 104,05 | 3,05       | 23,95 | 3,13 | 72,01  | 0,00  | 1,91  | 603,42 | 393,33 | 219,51    | 220,96 |       |        |        |      | -198,30    |           |      |      |
| 10         | 1000   | 100        | 540          | 551,54        | 1000                | 3,49   | 22,98 | 3,92 | 74,16  | 0,00  | 895,45 | 894,15        | 0,0009 | 0,0097 | 0,0010 | 0,68  | 0,00  | 893,46 | 105,85 | 3,49       | 22,97 | 3,92 | 73,48  | 0,00  | 1,99  | 608,24 | 394,01 | 219,33    | 225,26 |       |        |        |      | -198,17    |           |      |      |
| 10         | 1000   | 100        | 550          | 559,97        | 1000                | 3,73   | 22,45 | 4,27 | 75,08  | 0,00  | 894,47 | 893,12        | 0,0009 | 0,0093 | 0,0011 | 0,67  | 0,00  | 892,43 | 106,88 | 3,73       | 22,44 | 4,26 | 74,41  | 0,00  | 2,04  | 613,80 | 394,85 | 219,98    | 228,66 |       |        |        |      | -199,14    |           |      |      |
| 10         | 1000   | 100        | 560          | 568,24        | 1000                | 3,98   | 21,90 | 4,63 | 76,00  | 0,00  | 893,48 | 892,07        | 0,0010 | 0,0088 | 0,0012 | 0,67  | 0,00  | 891,39 | 107,93 | 3,98       | 21,89 | 4,63 | 75,34  | 0,00  | 2,09  | 619,20 | 395,73 | 220,60    | 232,07 |       |        |        |      | -200,08    |           |      |      |
| 10         | 1000   | 100        | 570          | 576,37        | 1000                | 4,23   | 21,34 | 5,02 | 76,92  | 0,00  | 892,48 | 891,01        | 0,0010 | 0,0084 | 0,0012 | 0,66  | 0,00  | 890,34 | 108,99 | 4,23       | 21,33 | 5,02 | 76,26  | 0,00  | 2,14  | 624,47 | 396,67 | 221,18    | 235,48 |       |        |        |      | -200,98    |           |      |      |
| 10         | 1000   | 100        | 580          | 584,40        | 1000                | 4,49   | 20,77 | 5,43 | 77,84  | 0,00  | 891,47 | 889,93        | 0,0010 | 0,0080 | 0,0013 | 0,65  | 0,00  | 889,28 | 110,07 | 4,49       | 20,77 | 5,43 | 77,19  | 0,00  | 2,19  | 629,62 | 397,66 | 221,74    | 238,90 |       |        |        |      | -201,85    |           |      |      |
| 10         | 1000   | 100        | 590          | 592,35        | 1000                | 4,75   | 20,20 | 5,86 | 78,75  | 0,00  | 890,44 | 888,85        | 0,0011 | 0,0075 | 0,0014 | 0,64  | 0,00  | 888,20 | 111,15 | 4,75       | 20,19 | 5,86 | 78,11  | 0,00  | 2,24  | 634,68 | 398,73 | 222,27    | 242,36 |       |        |        |      | -202,70    |           |      |      |
| 10         | 1000   | 100        | 600          | 600,19        | 1000                | 5,01   | 19,61 | 6,31 | 79,66  | 0,00  | 889,41 | 887,76        | 0,0011 | 0,0072 | 0,0014 | 0,63  | 0,00  | 887,12 | 112,24 | 5,01       | 19,60 | 6,31 | 79,02  | 0,00  | 2,29  | 639,65 | 399,87 | 222,78    | 245,82 |       |        |        |      | -203,52    |           |      |      |
| 15         | 1000   | 150        | 450          | 479,25        | 1000                | 1,89   | 41,91 | 0,48 | 99,32  | 0,00  | 856,40 | 854,83        | 0,0004 | 0,0145 | 0,0001 | 0,75  | 0,00  | 854,07 | 145,17 | 1,89       | 41,89 | 0,48 | 98,57  | 0,00  | 2,33  | 529,99 | 387,44 | 218,71    | 189,71 |       |        |        |      | -194,91    |           |      |      |
| 15         | 1000   | 150        | 460          | 490,98        | 1000                | 2,13   | 41,40 | 0,69 | 100,39 | 0,00  | 855,39 | 853,77        | 0,0004 | 0,0141 | 0,0001 | 0,74  | 0,00  | 853,01 | 146,23 | 2,13       | 41,38 | 0,69 | 99,65  | 0,00  | 2,38  | 539,95 | 389,16 | 219,02    | 192,49 |       |        |        |      | -195,29    |           |      |      |
| 15         | 1000   | 150        | 470          | 501,71        | 1000                | 2,36   | 40,88 | 0,99 | 101,33 | 0,00  | 854,43 | 852,75        | 0,0005 | 0,0136 | 0,0002 | 0,73  | 0,00  | 852,01 | 147,25 | 2,36       | 40,87 | 0,99 | 100,59 | 0,00  | 2,43  | 548,89 | 390,60 | 219,41    | 195,40 |       |        |        |      | -195,80    |           |      |      |
| 15         | 1000   | 150        | 480          | 511,43        | 1000                | 2,59   | 40,37 | 1,43 | 102,06 | 0,00  | 853,55 | 851,82        | 0,0005 | 0,0132 | 0,0003 | 0,72  | 0,00  | 851,08 | 148,18 | 2,59       | 40,36 | 1,43 | 101,33 | 0,00  | 2,47  | 557,20 | 391,85 | 219,75    | 198,27 |       |        |        |      | -196,26    |           |      |      |
| 15         | 1000   | 150        | 490          | 520,03        | 1000                | 2,80   | 39,86 | 2,03 | 102,50 | 0,00  | 852,80 | 851,01        | 0,0005 | 0,0128 | 0,0004 | 0,71  | 0,00  | 850,29 | 148,99 | 2,80       | 39,85 | 2,03 | 101,79 | 0,00  | 2,51  | 564,91 | 392,98 | 220,17    | 201,22 |       |        |        |      | -196,84    |           |      |      |
| 15         | 1000   | 150        | 500          | 527,40        | 1000                | 2,99   | 39,37 | 2,83 | 102,60 | 0,00  | 852,21 | 850,38        | 0,0006 | 0,0124 | 0,0006 | 0,70  | 0,00  | 849,66 | 149,62 | 2,99       | 39,35 | 2,83 | 101,89 | 0,00  | 2,55  | 572,13 | 394,01 | 220,69    | 204,24 |       |        |        |      | -197,59    |           |      |      |
| 15         | 1000   | 150        | 510          | 533,53        | 1000                | 3,16   | 38,90 | 3,81 | 102,34 | 0,00  | 851,79 | 849,92        | 0,0006 | 0,0121 | 0,0007 | 0,69  | 0,00  | 849,21 | 150,08 | 3,16       | 38,89 | 3,81 | 101,64 | 0,00  | 2,58  | 578,96 | 395,00 | 221,33    | 207,29 |       |        |        |      | -198,50    |           |      |      |
| 15         | 1000   | 150        | 520          | 550,35        | 1000                | 3,64   | 37,74 | 5,24 | 103,27 | 0,00  | 850,11 | 848,12        | 0,0006 | 0,0113 | 0,0010 | 0,67  | 0,00  | 847,43 | 151,88 | 3,64       | 37,73 | 5,24 | 102,59 | 0,00  | 2,68  | 584,25 | 395,78 | 220,53    | 211,61 |       |        |        |      | -197,49    |           |      |      |
| 15         | 1000   | 150        | 530          | 559,10        | 1000                | 3,90   | 37,14 | 5,73 | 104,15 | 0,00  | 849,07 | 847,02        | 0,0007 | 0,0109 | 0,0011 | 0,67  | 0,00  | 846,34 | 152,98 | 3,90       | 37,13 | 5,73 | 103,49 | 0,00  | 2,73  | 590,15 | 396,69 | 221,00    | 215,07 |       |        |        |      | -198,19    |           |      |      |
| 15         | 1000   | 150        | 540          | 567,63        | 1000                | 4,17   | 36,53 | 6,24 | 105,03 | 0,00  | 848,02 | 845,91        | 0,0007 | 0,0105 | 0,0011 | 0,66  | 0,00  | 845,24 | 154,09 | 4,17       | 36,52 | 6,24 | 104,37 | 0,00  | 2,79  | 596,26 | 397,67 | 221,13    | 218,12 |       |        |        |      | -198,44    |           |      |      |
| 15         | 1000   | 150        | 550          | 575,94        | 1000                | 4,45   | 35,90 | 6,78 | 105,90 | 0,00  | 846,97 | 844,79        | 0,0007 | 0,0101 | 0,0012 | 0,65  | 0,00  | 844,13 | 155,21 | 4,45       | 35,89 | 6,78 | 105,25 | 0,00  | 2,84  | 601,78 | 398,62 | 221,51    | 221,58 |       |        |        |      | -199,05    |           |      |      |
| 15         | 1000   | 150        | 560          | 584,07        | 1000                | 4,73   | 35,27 | 7,34 | 106,76 | 0,00  | 845,90 | 843,66        | 0,0008 | 0,0097 | 0,0013 | 0,64  | 0,00  | 843,01 | 156,34 | 4,73       | 35,26 | 7,34 | 106,12 | 0,00  | 2,89  | 607,07 | 399,59 | 221,91    | 225,11 |       |        |        |      | -199,70    |           |      |      |
| 15         | 1000   | 150        | 570          | 592,03        | 1000                | 5,01   | 34,62 | 7,92 | 107,61 | 0,00  | 844,83 | 842,52        | 0,0008 | 0,0093 | 0,0013 | 0,63  | 0,00  | 841,88 | 157,48 | 5,01       | 34,61 | 7,92 | 106,98 | 0,00  | 2,95  | 612,21 | 400,60 | 222,28    | 228,66 |       |        |        |      | -200,32    |           |      |      |
| 15         | 1000   | 150        | 580          | 599,86        | 1000                | 5,30   | 33,97 | 8,53 | 108,46 | 0,00  | 843,75 | 841,38        | 0,0008 | 0,0090 | 0,0014 | 0,63  | 0,00  | 840,74 | 158,62 | 5,30       | 33,96 | 8,53 | 107,83 | 0,00  | 3,01  | 617,23 | 401,66 | 222,64    | 232,25 |       |        |        |      | -200,93    |           |      |      |
| 15         | 1000   | 150        | 590          | 607,61        | 1000                | 5,59</ |       |      |        |       |        |               |        |        |        |       |       |        |        |            |       |      |        |       |       |        |        |           |        |       |        |        |      |            |           |      |      |

| FEED       |        |            |              |               | STREAM FROM REACTOR |      |       |       |        |       |        | LIQUID STREAM |        |        |        |       |       |        | GAS STREAM |      |       |       |        |       |       | PREHEATER |            |           | HEATER | COOLER  |
|------------|--------|------------|--------------|---------------|---------------------|------|-------|-------|--------|-------|--------|---------------|--------|--------|--------|-------|-------|--------|------------|------|-------|-------|--------|-------|-------|-----------|------------|-----------|--------|---------|
| kg/h       | kg/h   | kg/h       | °C           | °C            | kg/h                | kg/h | kg/h  | kg/h  | kg/h   | kg/h  | kg/h   | kg/h          | kg/h   | kg/h   | kg/h   | kg/h  | kg/h  | kg/h   | kg/h       | kg/h | kg/h  | kg/h  | kg/h   | kg/h  | kg/h  | kW        | °C         | °C        | kW     | kW      |
| X glycerol | F feed | F glycerol | T reac inlet | T reac outlet | F STREAM            | F H2 | F CH4 | FCO   | F CO2  | F GLY | F H2O  | F GAS         | F H2   | F CH4  | FCO    | F CO2 | F GLY | F H2O  | F GAS      | F H2 | F CH4 | FCO   | F CO2  | F GLY | F H2O | Duty      | T cold out | T hot out | Duty   | Duty    |
| 0,25       | 1000   | 250        | 450          | 508,69        | 1000                | 2,67 | 70,62 | 1,98  | 161,55 | 0,00  | 763,17 | 760,06        | 0,0003 | 0,0134 | 0,0002 | 0,67  | 0,00  | 759,37 | 239,94     | 2,67 | 70,61 | 1,98  | 160,89 | 0,00  | 3,80  | 517,80    | 394,56     | 216,89    | 160,35 | -188,14 |
| 0,25       | 1000   | 250        | 460          | 519,55        | 1000                | 2,93 | 69,95 | 3,00  | 161,82 | 0,00  | 762,31 | 759,13        | 0,0003 | 0,0131 | 0,0004 | 0,66  | 0,00  | 758,45 | 240,87     | 2,93 | 69,93 | 3,00  | 161,16 | 0,00  | 3,85  | 527,69    | 396,73     | 217,30    | 164,06 | -188,64 |
| 0,25       | 1000   | 250        | 470          | 528,02        | 1000                | 3,15 | 69,33 | 4,28  | 161,50 | 0,00  | 761,74 | 758,51        | 0,0003 | 0,0128 | 0,0005 | 0,65  | 0,00  | 757,85 | 241,49     | 3,15 | 69,32 | 4,27  | 160,85 | 0,00  | 3,89  | 536,49    | 398,56     | 217,86    | 167,71 | -189,39 |
| 0,25       | 1000   | 250        | 480          | 534,55        | 1000                | 3,33 | 68,77 | 5,73  | 160,73 | 0,00  | 761,43 | 758,16        | 0,0004 | 0,0126 | 0,0007 | 0,64  | 0,00  | 757,50 | 241,84     | 3,33 | 68,76 | 5,73  | 160,09 | 0,00  | 3,93  | 544,47    | 400,16     | 218,61    | 171,35 | -190,43 |
| 0,25       | 1000   | 250        | 490          | 555,96        | 1000                | 3,95 | 67,22 | 7,89  | 161,63 | 0,00  | 759,32 | 755,90        | 0,0004 | 0,0119 | 0,0009 | 0,62  | 0,00  | 755,26 | 244,10     | 3,95 | 67,20 | 7,88  | 161,00 | 0,00  | 4,05  | 550,44    | 401,34     | 217,02    | 176,36 | -188,15 |
| 0,25       | 1000   | 250        | 500          | 565,74        | 1000                | 4,27 | 66,47 | 8,72  | 162,35 | 0,00  | 758,19 | 754,70        | 0,0004 | 0,0115 | 0,0010 | 0,62  | 0,00  | 754,07 | 245,30     | 4,27 | 66,46 | 8,72  | 161,74 | 0,00  | 4,12  | 557,41    | 402,71     | 217,08    | 179,88 | -188,22 |
| 0,25       | 1000   | 250        | 510          | 575,06        | 1000                | 4,58 | 65,73 | 9,57  | 163,05 | 0,00  | 757,07 | 753,51        | 0,0005 | 0,0112 | 0,0010 | 0,61  | 0,00  | 752,89 | 246,49     | 4,58 | 65,72 | 9,57  | 162,44 | 0,00  | 4,18  | 563,98    | 404,03     | 217,11    | 183,38 | -188,27 |
| 0,25       | 1000   | 250        | 520          | 583,98        | 1000                | 4,89 | 64,98 | 10,45 | 163,72 | 0,00  | 755,96 | 752,33        | 0,0005 | 0,0109 | 0,0011 | 0,60  | 0,00  | 751,72 | 247,67     | 4,89 | 64,97 | 10,45 | 163,11 | 0,00  | 4,24  | 570,21    | 405,31     | 217,14    | 186,90 | -188,33 |
| 0,25       | 1000   | 250        | 530          | 592,56        | 1000                | 5,20 | 64,23 | 11,36 | 164,35 | 0,00  | 754,85 | 751,15        | 0,0005 | 0,0106 | 0,0012 | 0,59  | 0,00  | 750,55 | 248,85     | 5,20 | 64,22 | 11,36 | 163,76 | 0,00  | 4,30  | 576,14    | 406,58     | 217,18    | 190,45 | -188,41 |
| 0,25       | 1000   | 250        | 540          | 600,85        | 1000                | 5,52 | 63,47 | 12,29 | 164,97 | 0,00  | 753,75 | 749,98        | 0,0005 | 0,0103 | 0,0013 | 0,59  | 0,00  | 749,39 | 250,02     | 5,52 | 63,46 | 12,29 | 164,38 | 0,00  | 4,36  | 581,70    | 407,83     | 217,28    | 194,14 | -188,60 |
| 0,25       | 1000   | 250        | 550          | 608,88        | 1000                | 5,83 | 62,71 | 13,26 | 165,55 | 0,00  | 752,65 | 748,81        | 0,0006 | 0,0100 | 0,0013 | 0,58  | 0,00  | 748,22 | 251,19     | 5,83 | 62,70 | 13,25 | 164,98 | 0,00  | 4,42  | 586,96    | 409,08     | 217,44    | 197,93 | -188,87 |
| 0,25       | 1000   | 250        | 560          | 616,68        | 1000                | 6,15 | 61,94 | 14,24 | 166,12 | 0,00  | 751,55 | 747,65        | 0,0006 | 0,0098 | 0,0014 | 0,57  | 0,00  | 747,06 | 252,35     | 6,15 | 61,93 | 14,24 | 165,55 | 0,00  | 4,49  | 592,02    | 410,35     | 217,60    | 201,75 | -189,16 |
| 0,25       | 1000   | 250        | 570          | 624,28        | 1000                | 6,47 | 61,16 | 15,26 | 166,66 | 0,00  | 750,46 | 746,48        | 0,0006 | 0,0095 | 0,0015 | 0,56  | 0,00  | 745,91 | 253,52     | 6,47 | 61,15 | 15,26 | 166,09 | 0,00  | 4,55  | 596,92    | 411,65     | 217,75    | 205,59 | -189,44 |
| 0,25       | 1000   | 250        | 580          | 631,74        | 1000                | 6,79 | 60,37 | 16,30 | 167,18 | 0,00  | 749,36 | 745,32        | 0,0006 | 0,0092 | 0,0016 | 0,56  | 0,00  | 744,75 | 254,68     | 6,79 | 60,36 | 16,30 | 166,62 | 0,00  | 4,61  | 601,70    | 413,00     | 217,88    | 209,46 | -189,72 |
| 0,25       | 1000   | 250        | 590          | 639,12        | 1000                | 7,12 | 59,56 | 17,39 | 167,68 | 0,00  | 748,25 | 744,13        | 0,0006 | 0,0089 | 0,0016 | 0,55  | 0,00  | 743,57 | 255,87     | 7,12 | 59,56 | 17,39 | 167,13 | 0,00  | 4,68  | 606,41    | 414,42     | 218,01    | 213,41 | -189,99 |
| 0,25       | 1000   | 250        | 600          | 646,34        | 1000                | 7,44 | 58,75 | 18,51 | 168,16 | 0,00  | 747,14 | 742,95        | 0,0007 | 0,0087 | 0,0017 | 0,54  | 0,00  | 742,40 | 257,05     | 7,44 | 58,74 | 18,51 | 167,61 | 0,00  | 4,74  | 611,00    | 415,88     | 218,13    | 217,37 | -190,26 |
| 0,3        | 1000   | 300        | 450          | 521,37        | 1000                | 3,01 | 84,93 | 3,70  | 191,28 | 0,00  | 717,08 | 713,19        | 0,0003 | 0,0127 | 0,0003 | 0,62  | 0,00  | 712,56 | 286,81     | 3,01 | 84,92 | 3,70  | 190,65 | 0,00  | 4,52  | 514,73    | 399,55     | 213,02    | 141,78 | -180,62 |
| 0,3        | 1000   | 300        | 460          | 530,46        | 1000                | 3,24 | 84,23 | 5,38  | 190,57 | 0,00  | 716,58 | 712,63        | 0,0003 | 0,0124 | 0,0005 | 0,62  | 0,00  | 712,01 | 287,37     | 3,24 | 84,22 | 5,38  | 189,95 | 0,00  | 4,57  | 524,76    | 401,99     | 213,70    | 145,99 | -181,49 |
| 0,3        | 1000   | 300        | 470          | 551,35        | 1000                | 3,83 | 82,62 | 8,41  | 190,21 | 0,00  | 714,92 | 710,85        | 0,0003 | 0,0119 | 0,0008 | 0,60  | 0,00  | 710,24 | 289,15     | 3,83 | 82,61 | 8,41  | 189,61 | 0,00  | 4,69  | 531,95    | 403,67     | 212,46    | 151,68 | -179,63 |
| 0,3        | 1000   | 300        | 480          | 562,57        | 1000                | 4,18 | 81,78 | 9,46  | 190,87 | 0,00  | 713,71 | 709,56        | 0,0004 | 0,0116 | 0,0008 | 0,59  | 0,00  | 708,95 | 290,44     | 4,18 | 81,77 | 9,46  | 190,28 | 0,00  | 4,75  | 540,08    | 405,53     | 212,41    | 155,48 | -179,48 |
| 0,3        | 1000   | 300        | 490          | 572,97        | 1000                | 4,52 | 80,96 | 10,52 | 191,48 | 0,00  | 712,53 | 708,30        | 0,0004 | 0,0113 | 0,0009 | 0,58  | 0,00  | 707,71 | 291,70     | 4,52 | 80,94 | 10,52 | 190,90 | 0,00  | 4,82  | 547,41    | 407,20     | 212,45    | 159,37 | -179,49 |
| 0,3        | 1000   | 300        | 500          | 582,74        | 1000                | 4,86 | 80,13 | 11,60 | 192,04 | 0,00  | 711,38 | 707,08        | 0,0004 | 0,0110 | 0,0010 | 0,57  | 0,00  | 706,49 | 292,92     | 4,86 | 80,12 | 11,60 | 191,46 | 0,00  | 4,89  | 554,28    | 408,79     | 212,43    | 163,14 | -179,43 |
| 0,3        | 1000   | 300        | 510          | 591,99        | 1000                | 5,19 | 79,31 | 12,70 | 192,55 | 0,00  | 710,24 | 705,87        | 0,0004 | 0,0107 | 0,0011 | 0,57  | 0,00  | 705,29 | 294,13     | 5,19 | 79,30 | 12,70 | 191,98 | 0,00  | 4,95  | 560,73    | 410,31     | 212,42    | 166,91 | -179,39 |
| 0,3        | 1000   | 300        | 520          | 600,80        | 1000                | 5,52 | 78,50 | 13,83 | 193,03 | 0,00  | 709,13 | 704,69        | 0,0004 | 0,0104 | 0,0012 | 0,56  | 0,00  | 704,11 | 295,31     | 5,52 | 78,49 | 13,82 | 192,47 | 0,00  | 5,02  | 566,81    | 411,80     | 212,41    | 170,68 | -179,37 |
| 0,3        | 1000   | 300        | 530          | 609,25        | 1000                | 5,85 | 77,68 | 14,97 | 193,47 | 0,00  | 708,03 | 703,51        | 0,0005 | 0,0102 | 0,0012 | 0,55  | 0,00  | 702,95 | 296,49     | 5,85 | 77,67 | 14,97 | 192,92 | 0,00  | 5,08  | 572,41    | 413,22     | 212,53    | 174,64 | -179,54 |
| 0,3        | 1000   | 300        | 540          | 617,39        | 1000                | 6,18 | 76,86 | 16,15 | 193,88 | 0,00  | 706,94 | 702,35        | 0,0005 | 0,0099 | 0,0013 | 0,55  | 0,00  | 701,79 | 297,65     | 6,17 | 76,85 | 16,15 | 193,33 | 0,00  | 5,15  | 577,98    | 414,72     | 212,48    | 178,39 | -179,50 |
| 0,3        | 1000   | 300        | 550          | 625,24        | 1000                | 6,50 | 76,03 | 17,35 | 194,25 | 0,00  | 705,86 | 701,20        | 0,0005 | 0,0097 | 0,0014 | 0,54  | 0,00  | 700,65 | 298,80     | 6,50 | 76,02 | 17,34 | 193,71 | 0,00  | 5,21  | 583,10    | 416,17     | 212,60    | 182,37 | -179,69 |
| 0,3        | 1000   | 300        | 560          | 632,86        | 1000                | 6,83 | 75,21 | 18,57 | 194,60 | 0,00  | 704,79 | 700,06        | 0,0005 | 0,0094 | 0,0015 | 0,53  | 0,00  | 699,51 | 299,94     | 6,83 | 75,20 | 18,57 | 194,07 | 0,00  | 5,28  | 588,05    | 417,64     | 212,69    | 186,34 | -179,87 |
| 0,3        | 1000   | 300        | 570          | 640,26        | 1000                | 7,16 | 74,37 | 19,82 | 194,92 | 0,00  | 703,73 | 698,93        | 0,0005 | 0,0092 | 0,0015 | 0,53  | 0,00  | 698,39 | 301,07     | 7,16 | 74,36 | 19,82 | 194,39 | 0,00  | 5,34  | 592,84    | 419,16     | 212,78    | 190,32 | -180,04 |
| 0,3        | 1000   | 300        | 580          | 647,52        | 1000                | 7,49 | 73,53 | 21,11 | 195,21 | 0,00  | 702,66 | 697,79        | 0,0005 | 0,0090 | 0,0016 | 0,52  | 0,00  | 697,26 | 302,21     | 7,49 | 73,52 | 21,10 | 194,69 | 0,00  | 5,41  | 597,52    | 420,72     | 212,85    | 194,34 | -180,21 |
| 0,3        | 1000   | 300        | 590          | 654,72        | 1000                | 7,83 | 72,67 | 22,44 | 195,48 | 0,00  | 701,59 | 696,64        | 0,0006 | 0,0087 | 0,0017 | 0,51  | 0,00  | 696,11 | 303,36     | 7,83 | 72,66 | 22,44 | 194,96 | 0,00  | 5,47  | 602,14    | 422,36     | 212,92    | 198,44 | -180,38 |
| 0,3        | 1000   | 300        | 600          | 661,75        | 1000                | 8,16 | 71,80 | 23,80 | 195,71 | 0,00  | 700,52 | 695,50        | 0,0006 | 0,0085 | 0,0018 | 0,51  | 0,00  | 694,98 | 304,50     | 8,16 | 71,80 | 23,80 | 195,21 | 0,00  | 5,54  | 606,62    | 424,04     | 213,00    | 202,57 | -180,56 |

Note: The decimal separator used in these tables is the comma “,”.

2. Case study A

| FEED       |        |            |              |               | STREAM FROM REACTOR |      |       |      |        |       |        | LIQUID STREAM |        |        |        |       |       | GAS STREAM |        |      |       |      |        | 1 <sup>st</sup> PREHEATER |       |       | 2 <sup>nd</sup> PREHEATER |           |        | COOLER           |           |         |
|------------|--------|------------|--------------|---------------|---------------------|------|-------|------|--------|-------|--------|---------------|--------|--------|--------|-------|-------|------------|--------|------|-------|------|--------|---------------------------|-------|-------|---------------------------|-----------|--------|------------------|-----------|---------|
| %          | kg/h   | kg/h       | °C           | °C            | kg/h                | kg/h | kg/h  | kg/h | kg/h   | kg/h  | kg/h   | kg/h          | kg/h   | kg/h   | kg/h   | kg/h  | kg/h  | kg/h       | kg/h   | kg/h | kg/h  | kg/h | kg/h   | kW                        | °C    | °C    | kW                        | kg/h      | °C     | kW               |           |         |
| X glycerol | F feed | F glycerol | T reac inlet | T reac outlet | F STREAM            | F H2 | F CH4 | FCO  | F CO2  | F GLY | F H2O  | F GAS         | F H2   | F CH4  | FCO    | F CO2 | F GLY | F H2O      | F GAS  | F H2 | F CH4 | FCO  | F CO2  | F GLY                     | F H2O | Duty  | T cold out                | T hot out | Duty   | Exhaust Gas Flow | T hot out | Duty    |
| 10         | 1000   | 100        | 450          | 465,30        | 1000                | 1,51 | 27,44 | 0,22 | 67,74  | 0,00  | 903,09 | 902,28        | 0,0005 | 0,0146 | 0,0001 | 0,78  | 0,00  | 901,48     | 97,72  | 1,51 | 27,43 | 0,22 | 66,96  | 0,00                      | 1,60  | 65,25 | 85,00                     | 86,59     | 674,63 | 5850             | 165,09    | -698,86 |
| 10         | 1000   | 100        | 460          | 476,41        | 1000                | 1,72 | 27,03 | 0,31 | 68,74  | 0,00  | 902,21 | 901,36        | 0,0005 | 0,0140 | 0,0001 | 0,77  | 0,00  | 900,57     | 98,64  | 1,72 | 27,01 | 0,30 | 67,96  | 0,00                      | 1,64  | 65,25 | 85,00                     | 86,59     | 687,07 | 6050             | 171,32    | -709,38 |
| 10         | 1000   | 100        | 470          | 486,93        | 1000                | 1,92 | 26,60 | 0,42 | 69,72  | 0,00  | 901,34 | 900,43        | 0,0006 | 0,0135 | 0,0001 | 0,77  | 0,00  | 899,65     | 99,57  | 1,92 | 26,59 | 0,42 | 68,95  | 0,00                      | 1,68  | 65,25 | 85,00                     | 86,59     | 698,71 | 6250             | 177,59    | -719,05 |
| 10         | 1000   | 100        | 480          | 496,89        | 1000                | 2,13 | 26,17 | 0,59 | 70,65  | 0,00  | 900,46 | 899,51        | 0,0006 | 0,0129 | 0,0002 | 0,76  | 0,00  | 898,74     | 100,49 | 2,13 | 26,16 | 0,59 | 69,90  | 0,00                      | 1,72  | 65,25 | 85,00                     | 86,59     | 709,73 | 6440             | 183,20    | -728,07 |
| 10         | 1000   | 100        | 490          | 506,28        | 1000                | 2,33 | 25,72 | 0,82 | 71,50  | 0,00  | 899,62 | 898,61        | 0,0007 | 0,0124 | 0,0002 | 0,75  | 0,00  | 897,85     | 101,39 | 2,33 | 25,71 | 0,82 | 70,75  | 0,00                      | 1,76  | 65,25 | 85,00                     | 86,59     | 720,28 | 6600             | 186,99    | -736,56 |
| 10         | 1000   | 100        | 500          | 515,01        | 1000                | 2,54 | 25,27 | 1,17 | 72,20  | 0,00  | 898,82 | 897,77        | 0,0007 | 0,0119 | 0,0003 | 0,74  | 0,00  | 897,02     | 102,23 | 2,54 | 25,26 | 1,17 | 71,46  | 0,00                      | 1,80  | 65,25 | 85,00                     | 86,59     | 730,42 | 6780             | 191,93    | -744,64 |
| 10         | 1000   | 100        | 510          | 522,92        | 1000                | 2,73 | 24,82 | 1,66 | 72,67  | 0,00  | 898,12 | 897,02        | 0,0007 | 0,0114 | 0,0005 | 0,73  | 0,00  | 896,28     | 102,98 | 2,73 | 24,81 | 1,66 | 71,94  | 0,00                      | 1,84  | 65,25 | 85,00                     | 86,59     | 740,25 | 6950             | 196,22    | -752,41 |
| 10         | 1000   | 100        | 520          | 529,85        | 1000                | 2,90 | 24,38 | 2,31 | 72,85  | 0,00  | 897,56 | 896,41        | 0,0008 | 0,0110 | 0,0007 | 0,71  | 0,00  | 895,68     | 103,59 | 2,90 | 24,37 | 2,31 | 72,14  | 0,00                      | 1,88  | 65,25 | 85,00                     | 86,59     | 749,80 | 7115             | 200,18    | -759,96 |
| 10         | 1000   | 100        | 530          | 535,73        | 1000                | 3,05 | 23,96 | 3,13 | 72,72  | 0,00  | 897,14 | 895,95        | 0,0008 | 0,0106 | 0,0009 | 0,70  | 0,00  | 895,23     | 104,05 | 3,05 | 23,95 | 3,13 | 72,01  | 0,00                      | 1,91  | 65,25 | 85,00                     | 86,59     | 759,12 | 7270             | 203,57    | -767,38 |
| 15         | 1000   | 150        | 450          | 479,25        | 1000                | 1,89 | 41,91 | 0,48 | 99,32  | 0,00  | 856,40 | 854,83        | 0,0004 | 0,0145 | 0,0001 | 0,75  | 0,00  | 854,07     | 145,17 | 1,89 | 41,89 | 0,48 | 98,57  | 0,00                      | 2,33  | 65,17 | 85,00                     | 86,60     | 654,54 | 5620             | 161,02    | -690,97 |
| 15         | 1000   | 150        | 460          | 490,98        | 1000                | 2,13 | 41,40 | 0,69 | 100,39 | 0,00  | 855,39 | 853,77        | 0,0004 | 0,0141 | 0,0001 | 0,74  | 0,00  | 853,01     | 146,23 | 2,13 | 41,38 | 0,69 | 99,65  | 0,00                      | 2,38  | 65,17 | 85,00                     | 86,60     | 667,27 | 5820             | 167,47    | -701,31 |
| 15         | 1000   | 150        | 470          | 501,71        | 1000                | 2,36 | 40,88 | 0,99 | 101,33 | 0,00  | 854,43 | 852,75        | 0,0005 | 0,0136 | 0,0002 | 0,73  | 0,00  | 852,01     | 147,25 | 2,36 | 40,87 | 0,99 | 100,59 | 0,00                      | 2,43  | 65,17 | 85,00                     | 86,60     | 679,12 | 6015             | 173,66    | -710,75 |
| 15         | 1000   | 150        | 480          | 511,43        | 1000                | 2,59 | 40,37 | 1,43 | 102,06 | 0,00  | 853,55 | 851,82        | 0,0005 | 0,0132 | 0,0003 | 0,72  | 0,00  | 851,08     | 148,18 | 2,59 | 40,36 | 1,43 | 101,33 | 0,00                      | 2,47  | 65,17 | 85,00                     | 86,60     | 690,30 | 6205             | 179,52    | -719,53 |
| 15         | 1000   | 150        | 490          | 520,03        | 1000                | 2,80 | 39,86 | 2,03 | 102,50 | 0,00  | 852,80 | 851,01        | 0,0005 | 0,0128 | 0,0004 | 0,71  | 0,00  | 850,29     | 148,99 | 2,80 | 39,85 | 2,03 | 101,79 | 0,00                      | 2,51  | 65,17 | 85,00                     | 86,60     | 700,96 | 6385             | 184,70    | -727,83 |
| 15         | 1000   | 150        | 500          | 527,40        | 1000                | 2,99 | 39,37 | 2,83 | 102,60 | 0,00  | 852,21 | 850,38        | 0,0006 | 0,0124 | 0,0006 | 0,70  | 0,00  | 849,66     | 149,62 | 2,99 | 39,35 | 2,83 | 101,89 | 0,00                      | 2,55  | 65,17 | 85,00                     | 86,60     | 711,20 | 6560             | 189,52    | -735,80 |
| 15         | 1000   | 150        | 510          | 533,53        | 1000                | 3,16 | 38,90 | 3,81 | 102,34 | 0,00  | 851,79 | 849,92        | 0,0006 | 0,0121 | 0,0007 | 0,69  | 0,00  | 849,21     | 150,08 | 3,16 | 38,89 | 3,81 | 101,64 | 0,00                      | 2,58  | 65,17 | 85,00                     | 86,60     | 721,09 | 6730             | 193,99    | -743,56 |
| 15         | 1000   | 150        | 520          | 550,35        | 1000                | 3,64 | 37,74 | 5,24 | 103,27 | 0,00  | 850,11 | 848,12        | 0,0006 | 0,0113 | 0,0010 | 0,67  | 0,00  | 847,43     | 151,88 | 3,64 | 37,73 | 5,24 | 102,59 | 0,00                      | 2,68  | 65,17 | 85,00                     | 86,60     | 730,69 | 6900             | 198,38    | -747,86 |
| 15         | 1000   | 150        | 530          | 559,10        | 1000                | 3,90 | 37,14 | 5,73 | 104,15 | 0,00  | 849,07 | 847,02        | 0,0007 | 0,0109 | 0,0011 | 0,67  | 0,00  | 846,34     | 152,98 | 3,90 | 37,13 | 5,73 | 103,49 | 0,00                      | 2,73  | 65,17 | 85,00                     | 86,60     | 740,05 | 7065             | 202,41    | -754,48 |
| 20         | 1000   | 200        | 450          | 494,14        | 1000                | 2,28 | 56,30 | 1,00 | 130,73 | 0,00  | 809,71 | 807,37        | 0,0003 | 0,0140 | 0,0002 | 0,71  | 0,00  | 806,64     | 192,63 | 2,28 | 56,28 | 0,99 | 130,01 | 0,00                      | 3,07  | 65,08 | 85,00                     | 86,60     | 634,09 | 5375             | 155,66    | -682,34 |
| 20         | 1000   | 200        | 460          | 505,92        | 1000                | 2,55 | 55,69 | 1,49 | 131,61 | 0,00  | 808,67 | 806,26        | 0,0004 | 0,0136 | 0,0002 | 0,70  | 0,00  | 805,55     | 193,74 | 2,54 | 55,68 | 1,49 | 130,91 | 0,00                      | 3,12  | 65,08 | 85,00                     | 86,60     | 647,20 | 5580             | 162,72    | -692,60 |
| 20         | 1000   | 200        | 470          | 516,03        | 1000                | 2,79 | 55,11 | 2,18 | 132,13 | 0,00  | 807,79 | 805,33        | 0,0004 | 0,0133 | 0,0003 | 0,69  | 0,00  | 804,63     | 194,67 | 2,79 | 55,09 | 2,18 | 131,44 | 0,00                      | 3,17  | 65,08 | 85,00                     | 86,60     | 659,32 | 5780             | 169,53    | -701,96 |
| 20         | 1000   | 200        | 480          | 524,46        | 1000                | 3,01 | 54,55 | 3,10 | 132,22 | 0,00  | 807,13 | 804,62        | 0,0004 | 0,0129 | 0,0005 | 0,68  | 0,00  | 803,92     | 195,38 | 3,01 | 54,53 | 3,10 | 131,53 | 0,00                      | 3,21  | 65,08 | 85,00                     | 86,60     | 670,69 | 5975             | 175,98    | -710,72 |
| 20         | 1000   | 200        | 490          | 531,31        | 1000                | 3,19 | 54,02 | 4,23 | 131,88 | 0,00  | 806,68 | 804,13        | 0,0004 | 0,0127 | 0,0006 | 0,67  | 0,00  | 803,44     | 195,87 | 3,19 | 54,01 | 4,23 | 131,20 | 0,00                      | 3,25  | 65,08 | 85,00                     | 86,60     | 681,49 | 6160             | 181,70    | -719,10 |
| 20         | 1000   | 200        | 500          | 548,73        | 1000                | 3,68 | 52,74 | 6,31 | 132,13 | 0,00  | 805,14 | 802,46        | 0,0005 | 0,0120 | 0,0009 | 0,65  | 0,00  | 801,79     | 197,54 | 3,68 | 52,73 | 6,31 | 131,47 | 0,00                      | 3,34  | 65,08 | 85,00                     | 86,60     | 691,83 | 6340             | 187,03    | -723,50 |
| 20         | 1000   | 200        | 510          | 558,08        | 1000                | 3,97 | 52,07 | 6,95 | 132,95 | 0,00  | 804,05 | 801,31        | 0,0005 | 0,0116 | 0,0010 | 0,65  | 0,00  | 800,65     | 198,69 | 3,97 | 52,06 | 6,95 | 132,31 | 0,00                      | 3,40  | 65,08 | 85,00                     | 86,60     | 701,81 | 6515             | 191,96    | -730,41 |
| 20         | 1000   | 200        | 520          | 567,07        | 1000                | 4,26 | 51,40 | 7,61 | 133,76 | 0,00  | 802,97 | 800,16        | 0,0006 | 0,0112 | 0,0010 | 0,64  | 0,00  | 799,51     | 199,84 | 4,26 | 51,39 | 7,61 | 133,12 | 0,00                      | 3,46  | 65,08 | 85,00                     | 86,60     | 711,48 | 6690             | 196,79    | -736,99 |
| 20         | 1000   | 200        | 530          | 575,76        | 1000                | 4,55 | 50,72 | 8,30 | 134,54 | 0,00  | 801,88 | 799,01        | 0,0006 | 0,0109 | 0,0011 | 0,63  | 0,00  | 798,37     | 200,99 | 4,55 | 50,71 | 8,30 | 133,91 | 0,00                      | 3,52  | 65,08 | 85,00                     | 86,60     | 720,89 | 6860             | 201,23    | -743,28 |
| 25         | 1000   | 250        | 450          | 508,69        | 1000                | 2,67 | 70,62 | 1,98 | 161,55 | 0,00  | 763,17 | 760,06        | 0,0003 | 0,0134 | 0,0002 | 0,67  | 0,00  | 759,37     | 239,94 | 2,67 | 70,61 | 1,98 | 160,89 | 0,00                      | 3,80  | 64,98 | 85,00                     | 86,61     | 613,17 | 5120             | 149,27    | -672,93 |
| 25         | 1000   | 250        | 460          | 519,55        | 1000                | 2,93 | 69,95 | 3,00 | 161,82 | 0,00  | 762,31 | 759,13        | 0,0003 | 0,0131 | 0,0004 | 0,66  | 0,00  | 758,45     | 240,87 | 2,93 | 69,93 | 3,00 | 161,16 | 0,00                      | 3,85  | 64,98 | 85,00                     | 86,61     | 626,77 | 5335             | 157,40    | -683,33 |
| 25         | 1000   | 250        | 470          | 528,02        | 1000                | 3,15 | 69,33 | 4,28 | 161,50 | 0,00  | 761,74 | 758,51        | 0,0003 | 0,0128 | 0,0005 | 0,65  | 0,00  | 757,85     | 241,49 | 3,15 | 69,32 | 4,27 | 160,85 | 0,00                      | 3,89  | 64,98 | 85,00                     | 86,61     | 639,22 | 5540             | 164,87    | -692,89 |
| 25         | 1000   | 250        | 480          | 534,55        | 1000                | 3,33 | 68,77 | 5,73 | 160,73 | 0,00  | 761,43 | 758,16        | 0,0004 | 0,0126 | 0,0007 | 0,64  | 0,00  | 757,50     | 241,84 | 3,33 | 68,76 | 5,73 | 160,09 | 0,00                      |       |       |                           |           |        |                  |           |         |

3. Case study B

| FEED       |        |            |              |               |  | STREAM FROM REACTOR |      |       |       |        |       | LIQUID STREAM |        |        |        |        |       | GAS STREAM |        |        |      |       |       | PREHEATER |       |       |        | COOLER           |            |           |         |
|------------|--------|------------|--------------|---------------|--|---------------------|------|-------|-------|--------|-------|---------------|--------|--------|--------|--------|-------|------------|--------|--------|------|-------|-------|-----------|-------|-------|--------|------------------|------------|-----------|---------|
| %          | kg/h   | kg/h       | °C           | °C            |  | kg/h                | kg/h | kg/h  | kg/h  | kg/h   | kg/h  | kg/h          | kg/h   | kg/h   | kg/h   | kg/h   | kg/h  | kg/h       | kg/h   | kg/h   | kg/h | kg/h  | kg/h  | kg/h      | kW    | kg/h  | °C     | °C               | kW         |           |         |
| X glycerol | F feed | F glycerol | T reac inlet | T reac outlet |  | F STREAM            | F H2 | F CH4 | FCO   | F CO2  | F GLY | F H2O         | F LIQ  | F H2   | F CH4  | FCO    | F CO2 | F GLY      | F H2O  | F GAS  | F H2 | F CH4 | FCO   | F CO2     | F GLY | F H2O | Duty   | Exhaust Gas Flow | T cold out | T hot out | Duty    |
| 10         | 1000   | 100        | 450          | 465,30        |  | 1000                | 1,51 | 27,44 | 0,22  | 67,74  | 0,00  | 903,09        | 902,28 | 0,0005 | 0,0146 | 0,0001 | 0,78  | 0,00       | 901,48 | 97,72  | 1,51 | 27,43 | 0,22  | 66,96     | 0,00  | 1,60  | 739,88 | 6190             | 450        | 126,96    | -698,86 |
| 10         | 1000   | 100        | 460          | 476,41        |  | 1000                | 1,72 | 27,03 | 0,31  | 68,74  | 0,00  | 902,21        | 901,36 | 0,0005 | 0,0140 | 0,0001 | 0,77  | 0,00       | 900,57 | 98,64  | 1,72 | 27,01 | 0,30  | 67,96     | 0,00  | 1,64  | 752,32 | 6405             | 460        | 134,43    | -709,38 |
| 10         | 1000   | 100        | 470          | 486,93        |  | 1000                | 1,92 | 26,60 | 0,42  | 69,72  | 0,00  | 901,34        | 900,43 | 0,0006 | 0,0135 | 0,0001 | 0,77  | 0,00       | 899,65 | 99,57  | 1,92 | 26,59 | 0,42  | 68,95     | 0,00  | 1,68  | 763,96 | 6615             | 470        | 141,52    | -719,05 |
| 10         | 1000   | 100        | 480          | 496,89        |  | 1000                | 2,13 | 26,17 | 0,59  | 70,65  | 0,00  | 900,46        | 899,51 | 0,0006 | 0,0129 | 0,0002 | 0,76  | 0,00       | 898,74 | 100,49 | 2,13 | 26,16 | 0,59  | 69,90     | 0,00  | 1,72  | 774,99 | 6815             | 480        | 147,87    | -728,07 |
| 10         | 1000   | 100        | 490          | 506,28        |  | 1000                | 2,33 | 25,72 | 0,82  | 71,50  | 0,00  | 899,62        | 898,61 | 0,0007 | 0,0124 | 0,0002 | 0,75  | 0,00       | 897,85 | 101,39 | 2,33 | 25,71 | 0,82  | 70,75     | 0,00  | 1,76  | 785,53 | 7010             | 490        | 153,81    | -736,56 |
| 10         | 1000   | 100        | 500          | 515,01        |  | 1000                | 2,54 | 25,27 | 1,17  | 72,20  | 0,00  | 898,82        | 897,77 | 0,0007 | 0,0119 | 0,0003 | 0,74  | 0,00       | 897,02 | 102,23 | 2,54 | 25,26 | 1,17  | 71,46     | 0,00  | 1,80  | 795,68 | 7200             | 500        | 159,34    | -744,64 |
| 10         | 1000   | 100        | 510          | 522,92        |  | 1000                | 2,73 | 24,82 | 1,66  | 72,67  | 0,00  | 898,12        | 897,02 | 0,0007 | 0,0114 | 0,0005 | 0,73  | 0,00       | 896,28 | 102,98 | 2,73 | 24,81 | 1,66  | 71,94     | 0,00  | 1,84  | 805,50 | 7385             | 510        | 164,47    | -752,41 |
| 10         | 1000   | 100        | 520          | 529,85        |  | 1000                | 2,90 | 24,38 | 2,31  | 72,85  | 0,00  | 897,56        | 896,41 | 0,0008 | 0,0110 | 0,0007 | 0,71  | 0,00       | 895,68 | 103,59 | 2,90 | 24,37 | 2,31  | 72,14     | 0,00  | 1,88  | 815,06 | 7565             | 520        | 169,21    | -759,96 |
| 15         | 1000   | 150        | 450          | 479,25        |  | 1000                | 1,89 | 41,91 | 0,48  | 99,32  | 0,00  | 856,40        | 854,83 | 0,0004 | 0,0145 | 0,0001 | 0,75  | 0,00       | 854,07 | 145,17 | 1,89 | 41,89 | 0,48  | 98,57     | 0,00  | 2,33  | 719,70 | 5940             | 450        | 121,06    | -690,97 |
| 15         | 1000   | 150        | 460          | 490,98        |  | 1000                | 2,13 | 41,40 | 0,69  | 100,39 | 0,00  | 855,39        | 853,77 | 0,0004 | 0,0141 | 0,0001 | 0,74  | 0,00       | 853,01 | 146,23 | 2,13 | 41,38 | 0,69  | 99,65     | 0,00  | 2,38  | 732,44 | 6160             | 460        | 129,23    | -701,31 |
| 15         | 1000   | 150        | 470          | 501,71        |  | 1000                | 2,36 | 40,88 | 0,99  | 101,33 | 0,00  | 854,43        | 852,75 | 0,0005 | 0,0136 | 0,0002 | 0,73  | 0,00       | 852,01 | 147,25 | 2,36 | 40,87 | 0,99  | 100,59    | 0,00  | 2,43  | 744,29 | 6375             | 470        | 136,98    | -710,75 |
| 15         | 1000   | 150        | 480          | 511,43        |  | 1000                | 2,59 | 40,37 | 1,43  | 102,06 | 0,00  | 853,55        | 851,82 | 0,0005 | 0,0132 | 0,0003 | 0,72  | 0,00       | 851,08 | 148,18 | 2,59 | 40,36 | 1,43  | 101,33    | 0,00  | 2,47  | 755,47 | 6580             | 480        | 143,94    | -719,53 |
| 15         | 1000   | 150        | 490          | 520,03        |  | 1000                | 2,80 | 39,86 | 2,03  | 102,50 | 0,00  | 852,80        | 851,01 | 0,0005 | 0,0128 | 0,0004 | 0,71  | 0,00       | 850,29 | 148,99 | 2,80 | 39,85 | 2,03  | 101,79    | 0,00  | 2,51  | 766,13 | 6775             | 490        | 150,15    | -727,83 |
| 15         | 1000   | 150        | 500          | 527,40        |  | 1000                | 2,99 | 39,37 | 2,83  | 102,60 | 0,00  | 852,21        | 850,38 | 0,0006 | 0,0124 | 0,0006 | 0,70  | 0,00       | 849,66 | 149,62 | 2,99 | 39,35 | 2,83  | 101,89    | 0,00  | 2,55  | 776,36 | 6970             | 500        | 156,22    | -735,80 |
| 15         | 1000   | 150        | 510          | 533,53        |  | 1000                | 3,16 | 38,90 | 3,81  | 102,34 | 0,00  | 851,79        | 849,92 | 0,0006 | 0,0121 | 0,0007 | 0,69  | 0,00       | 849,21 | 150,08 | 3,16 | 38,89 | 3,81  | 101,64    | 0,00  | 2,58  | 786,25 | 7160             | 510        | 161,84    | -743,56 |
| 15         | 1000   | 150        | 520          | 550,35        |  | 1000                | 3,64 | 37,74 | 5,24  | 103,27 | 0,00  | 850,11        | 848,12 | 0,0006 | 0,0113 | 0,0010 | 0,67  | 0,00       | 847,43 | 151,88 | 3,64 | 37,73 | 5,24  | 102,59    | 0,00  | 2,68  | 795,86 | 7345             | 520        | 167,03    | -747,86 |
| 20         | 1000   | 200        | 450          | 494,14        |  | 1000                | 2,28 | 56,30 | 1,00  | 130,73 | 0,00  | 809,71        | 807,37 | 0,0003 | 0,0140 | 0,0002 | 0,71  | 0,00       | 806,64 | 192,63 | 2,28 | 56,28 | 0,99  | 130,01    | 0,00  | 3,07  | 699,16 | 5685             | 450        | 114,45    | -682,34 |
| 20         | 1000   | 200        | 460          | 505,92        |  | 1000                | 2,55 | 55,69 | 1,49  | 131,61 | 0,00  | 808,67        | 806,26 | 0,0004 | 0,0136 | 0,0002 | 0,70  | 0,00       | 805,55 | 193,74 | 2,54 | 55,68 | 1,49  | 130,91    | 0,00  | 3,12  | 712,28 | 5910             | 460        | 123,38    | -692,60 |
| 20         | 1000   | 200        | 470          | 516,03        |  | 1000                | 2,79 | 55,11 | 2,18  | 132,13 | 0,00  | 807,79        | 805,33 | 0,0004 | 0,0133 | 0,0003 | 0,69  | 0,00       | 804,63 | 194,67 | 2,79 | 55,09 | 2,18  | 131,44    | 0,00  | 3,17  | 724,39 | 6130             | 470        | 131,86    | -701,96 |
| 20         | 1000   | 200        | 480          | 524,46        |  | 1000                | 3,01 | 54,55 | 3,10  | 132,22 | 0,00  | 807,13        | 804,62 | 0,0004 | 0,0129 | 0,0005 | 0,68  | 0,00       | 803,92 | 195,38 | 3,01 | 54,53 | 3,10  | 131,53    | 0,00  | 3,21  | 735,77 | 6340             | 480        | 139,50    | -710,72 |
| 20         | 1000   | 200        | 490          | 531,31        |  | 1000                | 3,19 | 54,02 | 4,23  | 131,88 | 0,00  | 806,68        | 804,13 | 0,0004 | 0,0127 | 0,0006 | 0,67  | 0,00       | 803,44 | 195,87 | 3,19 | 54,01 | 4,23  | 131,20    | 0,00  | 3,25  | 746,57 | 6545             | 490        | 146,62    | -719,10 |
| 20         | 1000   | 200        | 500          | 548,73        |  | 1000                | 3,68 | 52,74 | 6,31  | 132,13 | 0,00  | 805,14        | 802,46 | 0,0005 | 0,0120 | 0,0009 | 0,65  | 0,00       | 801,79 | 197,54 | 3,68 | 52,73 | 6,31  | 131,47    | 0,00  | 3,34  | 756,91 | 6740             | 500        | 152,95    | -723,50 |
| 20         | 1000   | 200        | 510          | 558,08        |  | 1000                | 3,97 | 52,07 | 6,95  | 132,95 | 0,00  | 804,05        | 801,31 | 0,0005 | 0,0116 | 0,0010 | 0,65  | 0,00       | 800,65 | 198,69 | 3,97 | 52,06 | 6,95  | 132,31    | 0,00  | 3,40  | 766,88 | 6935             | 510        | 159,09    | -730,41 |
| 20         | 1000   | 200        | 520          | 567,07        |  | 1000                | 4,26 | 51,40 | 7,61  | 133,76 | 0,00  | 802,97        | 800,16 | 0,0006 | 0,0112 | 0,0010 | 0,64  | 0,00       | 799,51 | 199,84 | 4,26 | 51,39 | 7,61  | 133,12    | 0,00  | 3,46  | 776,55 | 7125             | 520        | 164,77    | -736,99 |
| 25         | 1000   | 250        | 450          | 508,69        |  | 1000                | 2,67 | 70,62 | 1,98  | 161,55 | 0,00  | 763,17        | 760,06 | 0,0003 | 0,0134 | 0,0002 | 0,67  | 0,00       | 759,37 | 239,94 | 2,67 | 70,61 | 1,98  | 160,89    | 0,00  | 3,80  | 678,15 | 5415             | 450        | 106,26    | -672,93 |
| 25         | 1000   | 250        | 460          | 519,55        |  | 1000                | 2,93 | 69,95 | 3,00  | 161,82 | 0,00  | 762,31        | 759,13 | 0,0003 | 0,0131 | 0,0004 | 0,66  | 0,00       | 758,45 | 240,87 | 2,93 | 69,93 | 3,00  | 161,16    | 0,00  | 3,85  | 691,75 | 5655             | 460        | 116,84    | -683,33 |
| 25         | 1000   | 250        | 470          | 528,02        |  | 1000                | 3,15 | 69,33 | 4,28  | 161,50 | 0,00  | 761,74        | 758,51 | 0,0003 | 0,0128 | 0,0005 | 0,65  | 0,00       | 757,85 | 241,49 | 3,15 | 69,32 | 4,27  | 160,85    | 0,00  | 3,89  | 704,21 | 5880             | 470        | 126,12    | -692,89 |
| 25         | 1000   | 250        | 480          | 534,55        |  | 1000                | 3,33 | 68,77 | 5,73  | 160,73 | 0,00  | 761,43        | 758,16 | 0,0004 | 0,0126 | 0,0007 | 0,64  | 0,00       | 757,50 | 241,84 | 3,33 | 68,76 | 5,73  | 160,09    | 0,00  | 3,93  | 715,82 | 6095             | 480        | 134,48    | -701,92 |
| 25         | 1000   | 250        | 490          | 555,96        |  | 1000                | 3,95 | 67,22 | 7,89  | 161,63 | 0,00  | 759,32        | 755,90 | 0,0004 | 0,0119 | 0,0009 | 0,62  | 0,00       | 755,26 | 244,10 | 3,95 | 67,20 | 7,88  | 161,00    | 0,00  | 4,05  | 726,80 | 6305             | 490        | 142,29    | -705,64 |
| 25         | 1000   | 250        | 500          | 565,74        |  | 1000                | 4,27 | 66,47 | 8,72  | 162,35 | 0,00  | 758,19        | 754,70 | 0,0004 | 0,0115 | 0,0010 | 0,62  | 0,00       | 754,07 | 245,30 | 4,27 | 66,46 | 8,72  | 161,74    | 0,00  | 4,12  | 737,28 | 6510             | 500        | 149,54    | -712,68 |
| 25         | 1000   | 250        | 510          | 575,06        |  | 1000                | 4,58 | 65,73 | 9,57  | 163,05 | 0,00  | 757,07        | 753,51 | 0,0005 | 0,0112 | 0,0010 | 0,61  | 0,00       | 752,89 | 246,49 | 4,58 | 65,72 | 9,57  | 162,44    | 0,00  | 4,18  | 747,36 | 6710             | 510        | 156,24    | -719,32 |
| 25         | 1000   | 250        | 520          | 583,98        |  | 1000                | 4,89 | 64,98 | 10,45 | 163,72 | 0,00  | 755,96        | 752,33 | 0,0005 | 0,0109 | 0,0011 | 0,60  | 0,00       | 751,72 | 247,67 | 4,89 | 64,97 | 10,45 | 163,11    | 0,00  | 4,24  | 757,11 | 6905             | 520        | 162,42    | -725,63 |
| 30         | 1000   | 300        | 450          | 521,37        |  | 1000                | 3,01 | 84,93 | 3,70  | 191,28 | 0,00  | 717,08        | 713,19 | 0,0003 | 0,0127 | 0,0003 | 0,62  | 0,00       | 712,56 | 286,81 | 3,01 | 84,92 | 3,70  | 190,65    | 0,00  | 4,52  | 656,51 | 5140             | 450        | 97,18     | -662,82 |
| 30         | 1000   | 300        | 460          | 530,46        |  | 1000                | 3,24 | 84,23 | 5,38  | 190,57 | 0,00  | 716,58        | 712,63 | 0,0003 | 0,0124 | 0,0005 | 0,62  | 0,00       | 712,01 | 287,37 | 3,24 | 84,22 | 5,38  | 189,95    | 0,00  | 4,57  | 670,75 | 5390             | 460        | 109,15    | -673,73 |
| 30         | 1000   | 300        | 470          | 551,35        |  | 1000                | 3,83 | 82,62 | 8,41  | 190,21 | 0,00  | 714,92        | 710,85 | 0,0003 | 0,0119 | 0,0008 | 0,60  | 0,00       | 710,24 | 289,15 | 3,83 | 82,61 | 8,41  | 189,61    | 0,00  | 4,69  | 683,64 | 5625             | 470        | 119,71    | -679,09 |
| 30         | 1000   | 300        | 480          | 562,57        |  | 1000                | 4,18 | 81,78 | 9,46  | 190,87 | 0,00  | 713,71        | 709,56 | 0,0004 | 0,0116 | 0,0008 | 0,59  | 0,00       | 708,95 | 290,44 | 4,18 | 81,77 | 9,46  | 190,28    | 0,00  | 4,75  | 695,56 | 5850             | 480        | 129,24    | -687,08 |
| 30         | 1000   | 300        | 490          | 572,97        |  | 1000                | 4,52 | 80,96 | 10,52 | 191,48 | 0,00  | 712,53        | 708,30 | 0,0004 | 0,0113 | 0,0009 | 0,58  | 0,00       | 707,71 | 291,70 | 4,52 | 80,94 | 10,52 | 190,90    | 0,00  | 4,82  | 706,77 | 6065             | 490        | 137,76    | -694,43 |
| 30         | 1000   | 300        | 500          | 582,74        |  | 1000                | 4,86 | 80,13 | 11,60 | 192,04 | 0,00  | 711,38        | 707,08 | 0,0004 | 0,01   |        |       |            |        |        |      |       |       |           |       |       |        |                  |            |           |         |
